# Supplementary material for: Three-dimensional imaging of YB56 by high-resolution electron microscopyElectronic supplementary information (ESI) available: Table S1: three-dimensional amplitudes and symmetrized phases of YB56 in Fourier transform derived by crystallographic image processing of HREM images, and amplitudes obtained from electron diffraction patterns. See http://www.rsc.org/suppdata/cc/b1/b107864j/
Source: Royal Society of Chemistry journal article supplement (doi:10.1039/b107864j), 2002-01-18
Supplement: b107864j.doc [file b107864j.doc]

Table S1. Three dimensional amplitudes and symmetrized phases of YB56 in Fourier transform derived by crystallographic image processing of HREM images, and amplitudes obtained from electron diffraction patterns.

# Indices (hkl) Symmetrized Amplitudes from

# phases Fourier transform

0 2 0 180 1217

0 4 0 180 5679

0 6 0 0 9213

0 8 0 0 3502

0 10 0 180 7079

0 12 0 180 1215

2 2 0 180 1014

2 2 2 0 2612

2 2 4 180 2831

2 4 0 180 2790

2 4 2 180 1165

2 4 4 0 4745

2 4 6 0 1222

2 6 0 180 546

2 6 2 0 4790

2 6 4 180 1222

2 6 6 180 1877

2 6 8 0 2551

2 8 0 0 962

2 8 2 180 581

2 8 8 180 443

2 10 0 0 235

2 10 2 0 1141

2 12 0 0 191

2 12 2 0 416

4 4 0 0 2093

4 4 4 0 1637

4 4 8 0 3643

4 6 0 180 1027

4 6 4 180 1735

4 6 6 180 2776

4 6 10 180 634

4 8 0 180 1677

4 8 4 0 3847

4 10 0 180 1077

4 10 4 180 481

4 12 0 180 398

6 6 0 180 981

6 6 6 0 791

6 8 0 180 2059

6 8 6 0 300

6 10 0 180 1115

6 10 6 180 225

8 8 0 0 1546

8 8 8 0 329

8 10 0 180 175
